# Supplementary material for: Allele-specific recognition of the 3′ splice site of INS intron 1
Source: PubMed Central journal article supplement — Hum Genet. 2010 Jul 14;128(4):383–400. doi: 10.1007/s00439-010-0860-1 (PMC2939332; doi:10.1007/s00439-010-0860-1), 2010-07-14
Supplement: 439_2010_860_MOESM1_ESM.pdf [file 439_2010_860_MOESM1_ESM.pdf]

## SUPPLEMENTAL DATA

### SUPPLEMENTAL FIGURES

#### SUPPLEMENTAL FIGURE 1 Dissection of haplotype-dependent *INS* pre-mRNA splicing

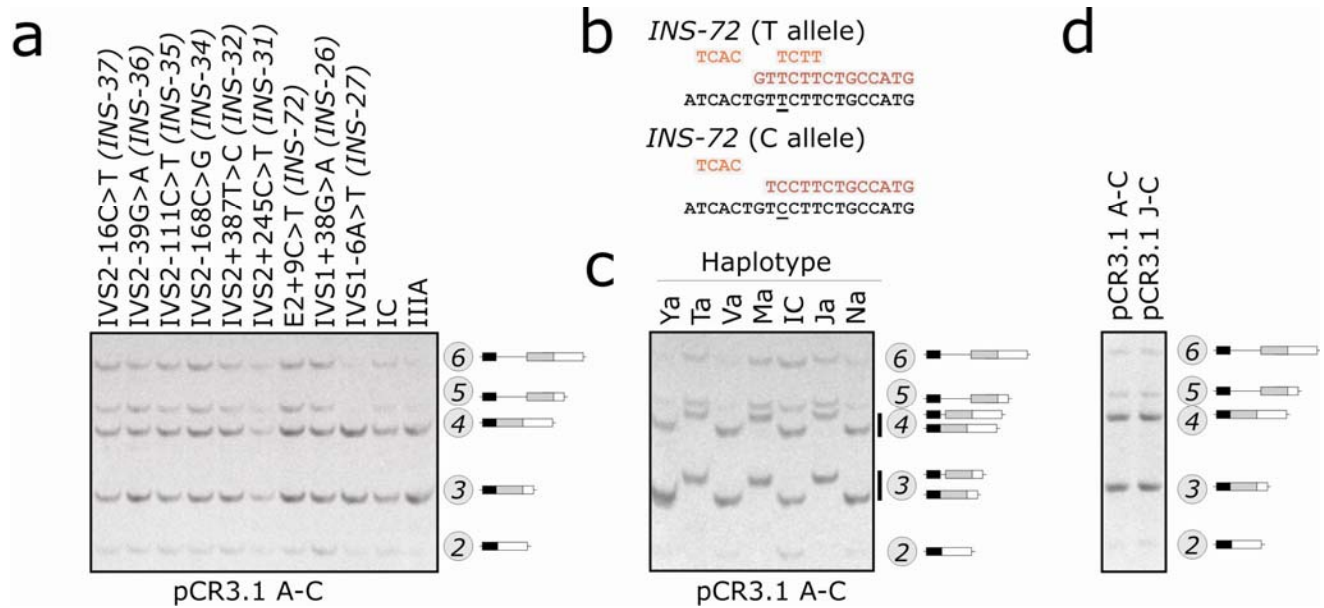

**Legend:** (A) Splicing pattern of reporter constructs mutated at naturally occurring *INS* variants. Mutations are denoted by the traditional nomenclature (<http://www.hgvs.org/mutnomen/>). The original designation (Stead et al. 2003) of the variant is followed in parentheses. RNA products are shown schematically to the right; template reporters for overlap-extension PCR are at the bottom. (B) Predicted auxiliary splicing elements at *INS*-72. Putative splicing regulatory motifs are shown above the sequence; variant residues at *INS*-72 are underlined. (C) Splicing pattern of African-specific haplotypes with (Ta, Ma, Ja) or without (Ya, Va, Na) the 4-nt insertion allele at *INS*-69. The IC haplotype is shown as a control. Haplotype designation was as previously described (Stead et al. 2003). (D) Splicing of reporter constructs with (primers J-C) and without (primers A-C) upstream minisatellite (VNTR) sequences is identical. Amplifications shown for panels B and C was with primers PL3 (Kralovicova et al. 2006a) and E. In experiment shown in panel D we employed PCR primers D and PL4 (Kralovicova et al. 2006a) (Figure 1).

## SUPPLEMENTAL FIGURE 2 Allele-specific *INS* splicing in mouse cell lines

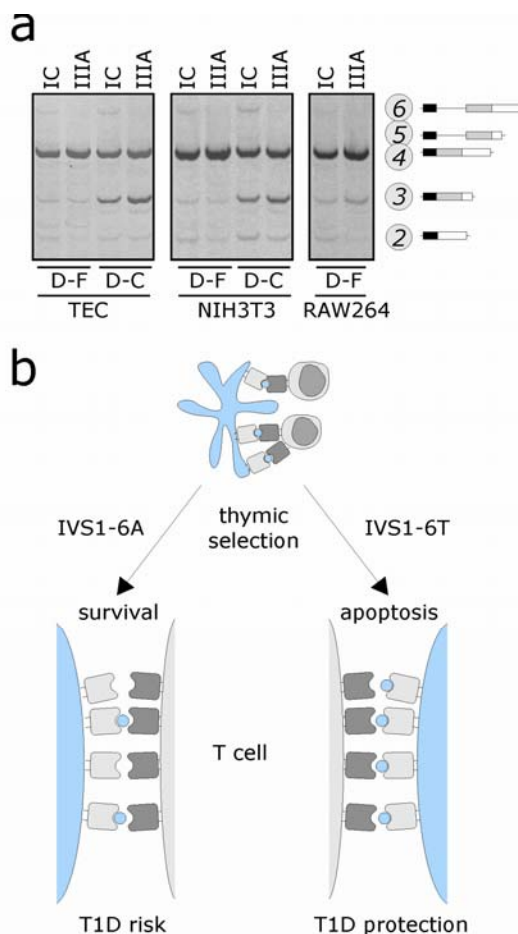

**Legend:** (A) Increased IR of the *INS* class IC haplotype as compared to the class IIIA haplotype in the *Aire*-expressing TEC cell line derived from thymic epithelial cells and in the macrophage cell line RAW264; NIH3T3 cells are shown as controls. The *INS* splicing pattern was not significantly different in a TEC cell line lacking *Aire* (data not shown). Haplotypes are at the top of each panel and mRNA isoforms to the right. Cloning primers are shown at the bottom; their location is depicted in Figure 1A. The extended 3' segment of D-F reporters inhibits the cryptic 3' splice site in *INS* exon 3 (cr3'ss+126), which is most likely mediated by the 3' end processing machinery that can influence selection of 3'ss of the last intron (Rigo and Martinson 2008). (B) A proposed model for genetic susceptibility to T1D at *IDDM2*. Unlike *INS-69*, which is confined to Africans, the *INS-27A* allele (IVS1-6A) has a high frequency in whites (Stead et al. 2003), indicating that this variant is critical for the haplotype-dependent proinsulin expression in this population. Antigen presenting cells will have a lower number of the MHC/proinsulin peptide complexes in carriers of the low-expressing and T1D-predisposing A alleles than in carriers of the T alleles. Their lower number would be associated with the lower probability of inducing apoptosis of autoreactive T cells in the thymus during negative selection. Antigen-presenting cells/antigenic peptides are in blue. MHC molecules and T-cell receptors are highlighted in light and dark gray, respectively.

### SUPPLEMENTAL FIGURE 3 Heterogenous nuclear RIBONUCLEOPROTEINS F/H in *INS* intron 1 splicing

**Legend:** (A) Increased intron 1 retention and decreased utilization of cr3'ss+126 in hnRNP F/H-depleted cells. siRNAs are at the top, RNA products to the right; sc, scrambled control. The final concentration of siRNAs in culture media was 80 (sc), 60 and 100 nM (hnRNP H/F). The D-F constructs used for this experiment contained the class IC haplotype. (B) Improved efficiency of intron 1 removal and cr3'ss+126 activation in cells overexpressing hnRNP H (1  $\mu$ g of pcDNA-hnRNP-H) and hnRNP F (1  $\mu$ g of pCI-hnRNP-F). EV, empty vector.

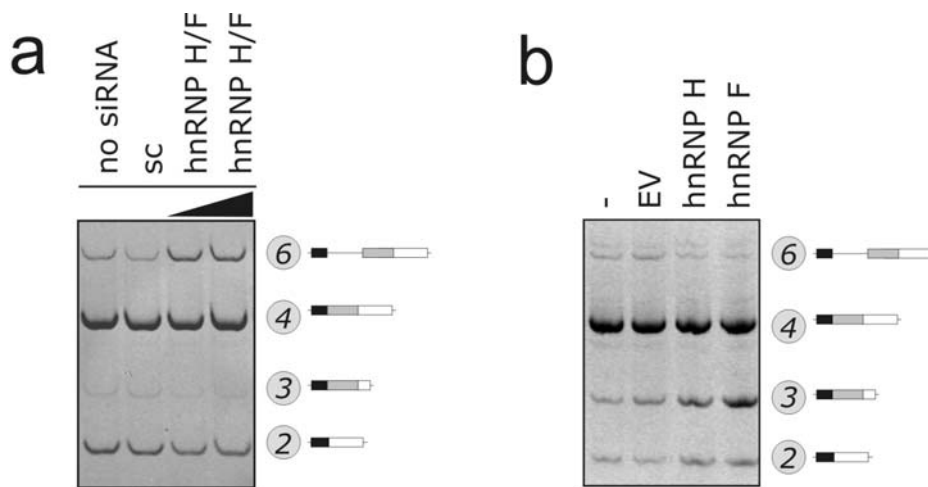

### SUPPLEMENTAL FIGURE 4 Sequence alignment of the 5' untranslated region of the proinsulin gene in primates

**Legend:** Intronic sequences are in lower case, exonic sequences are in upper case. Lineage-specific changes observed in at least two species/animals are highlighted in gray. Naturally occurring human polymorphisms are in red. Alignment was carried out using the Clustal-Wallis algorithm (v. 2.0). Hs, *Homo sapiens* (Stead et al. 2003)(Genbank accession numbers AY138590 and L15440); Pt1-2, *Pan troglodytes* (Stead et al. 2003) (this study); Gg, *Gorilla gorilla* (Stead et al. 2003)(AY137500); Pp1-2, *Pongo pygmeus* and *abelii* (AY137503 and AC199962); Hg1, Hg2, *Hylobates gabriellae* (this study); Eryp, *Erythrocebus patas* (this study); Cae, *Chlorocebus aethiops* (X61092); Cc116, *Cercopithecus campbelli* (this study); Cd2A, *Cercopithecus diana* (this study); Ca303, *Cercopithecus ascanius* (this study); Mt114, *Macaca tonkeana* (this study); Mf, *Macaca fuscata* (this study); Mm1, Mm2, *Macaca mulatta* (Indian and Chinese, respectively; this study); Ms, *Macaca sylvanus* (this study); Ph100, *Papio hamydras* (this study); Msp119, Msp102, *Mandrillus sphinx* (this study); Cang, *Colobus angolensis* (this study); Ac1af, *Colobus guereza* (this study); Se117, Se2, *Semnopithecus entellus* (this study); Pn, *Pygathrix nemaeus* (this study); To, *Trachypithecus obscurus* (this study); Ta, *Trachypithecus auratus* (this study); Sv, *Semnopithecus vetulus* (this study); Pm, *Presbytis melalophos* (this study); Nl, *Nasalis larvatus* (this study); Cj, *Callithrix jacchus* (this study); So1, *Saguinus oedipus* (this study); Smid92; *Saguinus midas* (this study); Sfl15, *Saguinus fuscicollis* (this study); Calgo6, *Callimico goeldii* (this study); Aab203, *Aotus azarae* (this study); At, *Aotus trivirgatus* (J02989); Mur, *Microcebus murinus* (Ensembl scaffold sequence, [www.ensembl.org](http://www.ensembl.org)). Y, C or T; W, A or T; N, C or G or T or A. Genbank accession numbers of new sequences: GU901169-GU901198.

```

                                                    G0
Hs      CAGCCCTCCAGGACAGGCTGCATCAGAAGAGGCCATCAAGCAGgtctttgcttccaagg 60
Pt1     CAGCCCTCCAGGACAGGCTGCATCAGAAGAGGCCATCAAGCAGgtct----gttccaagg 56
Pt2     CAGCCCTCCAGGACAGGCTGCATCAGAAGAGGCCATCAAGCAGgtct----gttccaagg 56
Gg      CAGCCCTCCAGGACAGGCTGCATCAGAAGAGGCCATCAAGCAGgtct----gttccaagg 56
Pp1     CAGCCCTCCGGGACAGGCTGCATCAGAAGAGGCCATCAAGCAGgtct----gttccaagg 56
Pp2     CAGCCCTCCGGGACAGGCTGCATCAGAAGAGGCCATCAAGCAGgtct----gttccaagg 56
Hg1     CAACCCCTCCGGGACAGGCTGCATCAGAAGAGGCCAGCAAGCAGgtct----gttccaagg 56
Hg2     CAACCCCTCCGGGACAGGCTGCATCAGAAGAGGCCAGCAAGCAGgtct----gttccaagg 56
Eryp    CAACCCCTCCGGGACAGGCTGCATCAGAAGAGGCCAGCAAGCAGgtct----gttccaagg 56
Cae     CAACCCCTC--GGAC--G-CTGCATCAGAAGAGGCCAGCAAGCAGgtct----gttccaagg 52
Cc116  CAACCCCTCCGGGAC--GGCTGCATCAGAAGAGGCCAGCAAGCAGgtct----gttccaagg 55
Cd2A    CAACCCCTCCGGGAC--GGCTGCATCAGAAGAGGCCAGCAAGCAGgtct----gttccaagg 55
Ca303   CAACCCCTCCAGGAC--GGCTGCATCAGAAGAGGCCAGCAAGCAGgtct----gttccaagg 55
Mt114   CAACCCCTCCGGGACAGGCTGCNTCAGAAGAGGCCAGCAAGCAGgtct----gttccaagg 56
Mf      CAACCCCTCCGGGACAGGCTGCATCAGAAGAGGCCAGCAAGCAGgtct----gttccaagg 56
Mm1     CAACCCCTCCGGGACAGGCTGCATCAGAAGAGGCCAGCAAGCAGgtct----gttccaagg 56
Mm2     CAACCCCTCCGGGACAGGCTGCATCAGAAGAGGCCAGCAAGCAGgtct----gttccaagg 56
Ms      CAACCCCTCCGGGACAGGCTGCATCAGAAGAGGCCAGCAAGCAGgtct----gttccaagg 56
Ph100   CAACCCCTCCGGGACAGGCTGCATCAGAAGAGGCCAGCAAGCAGgtct----gttccaagg 56
Msp119  CAACCCCTCCGGGACAGGCTGCATCAGAAGAGGCCAGCAAGCAGgtct----gttccaagg 56
Msp102  CAACCCCTCCGGGACAGGCTGCATCAGAAGAGGCCAGCAAGCAGgtct----gttccaagg 56
Cang    CAACCCCTCCGGGACAGGCTGCATCAGAAGAGGCCAGCAAGCAGgtct----gttccaagg 56
Ac1af   CAACCCCTCCGGGACAGGCTGCATCAGAAGAGGCCAGCAAGCAGgtct----gttccaagg 56
Se117   CAACCCCTCCGGGACAGGCTGCATCAGAAGAGGCCAGCAAGCAGgtct----gttccaagg 56
Se2     CAACCCCTCCGGGACAGGCTGCATCAGAAGAGGCCAGCAAGCAGgtct----gttccaagg 56
Pn      CAACCCCTCCGGGACAGGCTGCATCAGAAGAGGCCAGCAAGCAGgtct----gttccaagg 56
To      CAACCCCTCCGGGACAGGCTGCATCAGAAGAGGCCAGCAAGCAGgtct----gttccaagg 56
Ta      CAACCCCTCCAGGACAGGCTGCATCAGAAGAGGCCAGCAAGCAGgtct----gttccaagg 56
Sv      CAACCCCTCCGGGACAGGCTGCATCAGAAGAGGCCAGCAAGCAGgtct----gttccaagg 56
Pm      CAACCCCTCCAGGACAGGCTGCATCAGAAGAGGCCAGCAAGCAGgtct----gttccaagg 56
Nl      CAACCCCTCCGGGACAGGCTGCATCAGAAGAGGCCAGCAAGCAGgtct----gttccaagg 56
Cj      CAGCCCTCCGGGACAGGCTGCATCGCAGGAGCCAGCCAGCAGgtgt----gttccaagg 56
So1     CAGCCCTCCGGGACAGCCGCATCAGAGGAGCCAGCCAGCAGgtct----gttccaagg 56
Smid92  CAGCCCTCCGGGACAGCCGCATCAGAGGAGCCAGCCAGCAGgtct----gttccaagg 56
Sfl15   CAGCCCTCCGGGACAGCCGCATCAGAGGAGCCAGCCAGCAGgtct----gttccaagg 56
Calgo6  CAGCCCTCCGGGACAGGCTGCATCACA--GACCAGCCAGCAGgtct----gttccaagg 53
Aab203  CAGCCCTCCGGGACAGGCTGCATCAGAGGAGCCAGCCAGCAGgtct----gttccaagg 56
At      CTACGCCCGGGACAGGCTGCATCAGAGGAGCCAGCCAGCAGgtct----gttccaagg 56
Mur     CAGCCCTGC--GGACAGGCTGTTTCCCGGCCGTCAGCGAGCAGgtct----gttccaagg 55
```

|        | G1                                                            | G2 |     |
|--------|---------------------------------------------------------------|----|-----|
| Hs     | gccttgcgctcaggtggg--ctcaggx-----ttccaggggtggctggac            |    | 102 |
| Pt1    | gccttgcgctcaggtggg--ctcaggg-----ttccaggggtggctggac            |    | 98  |
| Pt2    | gccttgcgctcaggtggg--ctcaggg-----ttccaggggtggctggac            |    | 98  |
| Gg     | gccttgcgctcaggtggg--ctcagggctgccccacttgggggttccaggggtggctggac |    | 114 |
| Pp1    | gccttgcgctcaggtggg--ctcagggctgccccacttgggggttccaggggtggctggac |    | 114 |
| Pp2    | gccttgcgctcaggtggg--ctcagggctgccccacttgggggttccaggggtggctggac |    | 114 |
| Hg1    | gccttcaagtcaggtggg--ctcagggctgccccacttgggggttccaggggtggctggac |    | 114 |
| Hg2    | gccttcaagtcaggtggg--ctcagggctgccccacttgggggttccaggggtggctggac |    | 114 |
| Eryp   | gccttcaagtcaggtggg--ctcagggctgccccacttgggggttccaggggtggctggac |    | 114 |
| Cae    | gccttgcgctcaggtggg--ctcagggctgccc-acttgggggttccaggggtggctggac |    | 109 |
| Ce116  | gccttcaagtcaggtggg--ctcagggctgccccacttgggggttccaggggtggctggac |    | 113 |
| Cd2A   | gccttgcgctcaggtggg--ctcrgggcygccccacttgggggttccaggggtggctggac |    | 113 |
| Ca303  | gccttgcgctcaggtggg--ctcagggctgccccacttgggggttccaggggtggctggac |    | 113 |
| Mt114  | gccttcaagtcaggtggg--ctcagggctgccccacttgggggttccaggggtggctggac |    | 114 |
| Mf     | gccttgcgctcaggtggg--ctcagggctgccccacttgggggttccaggggtggctggac |    | 114 |
| Mm1    | gccttgcgctcaggtggg--ctcagggctgccccacttgggggttccaggggtggctggac |    | 114 |
| Mm2    | gccttgcgctcaggtggg--ctcagggctgccccacttgggggttccaggggtggctggac |    | 114 |
| Ms     | gccttgcgctcaggtggg--ctcagggctgccccacttgggggttccaggggtggctggac |    | 114 |
| Ph100  | gccttgcgctcaggtggg--ctcagggctgccccacttgggggttccaggggtggctggac |    | 114 |
| Msp119 | gccttgcgctcaggtggg--ctcagggctgccccacttgggggttccaggggtggctggac |    | 114 |
| Msp102 | gccttgcgctcaggtggg--ctcagggctgccccacttgggggttccaggggtggctggac |    | 114 |
| Cang   | gccttgcgctcaggtggg--ntcagggctgccccacttgggggttccaggggtggctggac |    | 114 |
| Ac1af  | gccttgcgctcaggtggg--ctcagggctgccccacttgggggttccaggggtggctggac |    | 114 |
| Se117  | gccttgcgctcaggtggg--ctcagggctgccccacttgggg-----               |    | 96  |
| Se2    | gccttgcgctcaggtggg--ctcagggctgccccacttgggg-----               |    | 96  |
| Pn     | gccttgcgctcaggtggg--ctcagggctgccccacttgggg-----               |    | 96  |
| To     | gccttgcgctcaggtggg--ctcagggctgccccacttgggg-----               |    | 96  |
| Ta     | gccttgcgctcaggtggg--ctcagggctgccccacttgggg-----               |    | 96  |
| Sv     | gccttgcgctcaggtggg--ctcagggctgccccacttgggg-----               |    | 96  |
| Pm     | gccttgcgctcaggtggg--ctcagggctgccccacttgggg-----               |    | 96  |
| Nl     | gccttgcgctcaggtggg--ctcagggctgccccacttgggg-----               |    | 96  |
| Cj     | gccttgcgctcaggtggg--ccagggctgccccacttgggggttgcagagcagttggac   |    | 115 |
| So1    | gccttgcgctcaggtggg--ccagggctgccccacttgggggttgcagagcagttggac   |    | 115 |
| Smid92 | gccttgcgctcaggtggg--ccagggctgccccacttgggggttgcagagcagttggac   |    | 115 |
| Sf115  | gccttgcgctcaggtggg--ccagggctgccccacttgggggttgcagagcagttggac   |    | 115 |
| Calgo6 | gccttgcgctcaggtggg--ccagggctgccccacttgggggttgcagagcagttggac   |    | 112 |
| Aab203 | gccttgcgctcaggtggg--ccagggctgccccacttgggggttgcagagcagttggac   |    | 115 |
| At     | gccttgcgctcaggtggg--ccagggctgccccacttgggggttgcagagcagttggac   |    | 115 |
| Mur    | gcctcggctcggggcgt-----gggacc-----cgggac                       |    | 85  |

|        | G3                                                            | uORF1 | G4 | uORF2 | G5 |     |
|--------|---------------------------------------------------------------|-------|----|-------|----|-----|
| Hs     | cccaggccc-cagctctgcagcaggagg-acgtgg-ctgggctctgaaagcatttgggg   |       |    |       |    | 159 |
| Pt1    | cccaggccc-cagctctgcagcaggagg-acgtgg-ctgggctctgaaagcatttgggg   |       |    |       |    | 155 |
| Pt2    | cccaggccc-cagctctgcagcaggagg-acgtgg-ctgggctctgaaagcatttgggg   |       |    |       |    | 155 |
| Gg     | cccaggccc-cagctctgcagcaggagg-acgtgg-ctgggctctgaaagcatttgggg   |       |    |       |    | 171 |
| Pp1    | cccaggccc-cagctctgcagcaggagg-acgtgg-ctgggctctgaaagcatttgggg   |       |    |       |    | 171 |
| Pp2    | cccaggccc-cagctctgcagcaggagg-acgtgg-ctgggctctgaaagcatttgggg   |       |    |       |    | 171 |
| Hg1    | cccaggccc-cagctctgcaacaggagg-acatgg-ctgggctctgaaagcatttgggg   |       |    |       |    | 171 |
| Hg2    | cccaggccc-cagctctgcaacaggagg-acatgg-ctgggctctgaaagcatttgggg   |       |    |       |    | 171 |
| Eryp   | cccaggccc-cagctctgcaacaggagg-acatgg-ctgggctctgaaagcatttgggg   |       |    |       |    | 171 |
| Cae    | cccaggccc-cagctctgcaacaggagg-acatgg-ctgggctctgaaagcatttgggg   |       |    |       |    | 166 |
| Ce116  | cccaggccc-cagctctgcaacaggagg-acatgg-ctgggctctgaaagcatttgggg   |       |    |       |    | 170 |
| Cd2A   | cccaggccc-cagctctgcaacaggagg-acatgg-ctgggctctgaaagcatttgggg   |       |    |       |    | 170 |
| Ca303  | cccaggccc-cagctctgcaacaggagg-acatgg-ctgggctctgaaagcatttgggg   |       |    |       |    | 170 |
| Mt114  | cccaggccc-cagctctgcaacaggagg-acatgg-ctgggctctgaaagcatttgggg   |       |    |       |    | 171 |
| Mf     | cccaggccc-cagctctgcaacaggagg-acatgg-ctgggctctgaaagcatttgggg   |       |    |       |    | 171 |
| Mm1    | cccaggccc-cagctctgcaacaggagg-acatgg-ctgggctctgaaagcatttgggg   |       |    |       |    | 171 |
| Mm2    | cccaggccc-cagctctgcaacaggagg-acatgg-ctgggctctgaaagcatttgggg   |       |    |       |    | 171 |
| Ms     | cccaggccc-cagctctgcaacaggagg-acatgg-ctgggctctgaaagcatttgggg   |       |    |       |    | 171 |
| Ph100  | cccaggccc-cagctctgcaacaggagg-acatgg-ctgggctctgaaagcatttgggg   |       |    |       |    | 171 |
| Msp119 | cccaggccc-cagctctgcaacaggagg-acatgg-ctgggctctgaaagcatttgggg   |       |    |       |    | 171 |
| Msp102 | cccaggccc-cagctctgcaacaggagg-acatgg-ctgggctctgaaagcatttgggg   |       |    |       |    | 171 |
| Cang   | cccaggccc-cagctctgcaacaggagg-acatgg-ntgggctctgaaagcatttgggg   |       |    |       |    | 171 |
| Ac1af  | cccaggccc-cagctctgcaacaggagg-acatgg-ctgggctctgaaagcatttgggg   |       |    |       |    | 171 |
| Se117  | -----cagctctgcaacaggagg-acatgg-ctgggctctgaaagcatttgggg        |       |    |       |    | 144 |
| Se2    | -----cagctctgcaacaggagg-acatgg-ctgggctctgaaagcatttgggg        |       |    |       |    | 144 |
| Pn     | -----cagctctgcaacaggagg-acatgg-ctgggctctgaaagcatttgggg        |       |    |       |    | 144 |
| To     | -----cagctctgcaacaggagg-acatgg-ctgggctctgaaagcatttgggg        |       |    |       |    | 144 |
| Ta     | -----cagctctgcaacaggagg-acatgg-ctgggctctgaaagcatttgggg        |       |    |       |    | 144 |
| Sv     | -----cagctctgcaacaggagg-acatgg-ctgggctctgaaagcatttgggg        |       |    |       |    | 144 |
| Pm     | -----cagctctgcaacaggagg-acatgg-ctgggctctgaaagcatttgggg        |       |    |       |    | 144 |
| Nl     | -----cagctctgcaacaggagg-acatgg-ctgggctctgaaagcatttgggg        |       |    |       |    | 144 |
| Cj     | cccaggccc-cagctctgcagtgaggagg--catgg-ctgggctc-tgaaagcattt--gg |       |    |       |    | 168 |
| So1    | cccaggccc-cagctctgcagtgaggagg--catgg-ctgggctc-tgaaagcattt--gg |       |    |       |    | 168 |
| Smid92 | cccaggccc-cagctctgcagtgaggagg--catgg-ctgggctc-tgaaagcattt--gg |       |    |       |    | 168 |
| Sf115  | cccaggccc-cagctctgcagtgaggagg--catgg-ctgggctc-tgaaagcattt--gg |       |    |       |    | 168 |
| Calgo6 | cccaggccc-cagctctgcagtgaggagg--catgg-ctgggctc-tgaaagcattt--gg |       |    |       |    | 165 |
| Aab203 | cc-----cagctctgcagtgaggagg--tgagg-ctgggctc-tgaaagcattt--gg    |       |    |       |    | 161 |
| At     | cc-----cagctctgcagtgaggagg--tgagg-ctgggctc-tgaaagcattt--gg    |       |    |       |    | 160 |
| Mur    | cccagctctgcagtgaggagg--tgagg-ctgggctc-tgaaagcattt--gg         |       |    |       |    | 145 |

|        | G6                                                           | G7 |     |
|--------|--------------------------------------------------------------|----|-----|
| Hs     | gtgagccaggggcccccaaggcagggcacctggccttcagccctgacctgacctgctgt  |    | 219 |
| Pt1    | gtgagccaggggcccccaaggcagggcacctggccttcagccctgacctgacctgctgt  |    | 215 |
| Pt2    | gtgagccaggggcccccaaggcagggcacctg-ccttcagccctgacctgacctgctgt  |    | 214 |
| Gg     | gtgagccaggggcccccaaggcagggcacctggccttcagccctgacctgacctgctgt  |    | 231 |
| Pp1    | gtgagccaggggcccccaaggcagggcacctggccttcagccctgacctgacctgctgt  |    | 231 |
| Pp2    | gtgagccaggggcccccaaggcagggcacctggccttcagccctgacctgacctgctgt  |    | 231 |
| Hg1    | gtgagccaggggcccccaaggcagggcacctggccttcagccctgacctgacctgctgt  |    | 231 |
| Hg2    | gtgagccaggggcccccaaggcagggcacctggccttcagccctgacctgacctgctgt  |    | 231 |
| Eryp   | gtgagccaggggcccccaaggcagggcacctggccttcagccctgacctgacctgctgt  |    | 231 |
| Cae    | gtgaaaccaggggccc-agggcagg-cacctggcct-cagctggcctcaggc-tgctgt  |    | 222 |
| Ce116  | gtgaaaccaggggcccccaaggcagggcacctggccttcagctggcctcaggcctgctgt |    | 230 |
| Cd2A   | gtgaaaccaggggcccccaaggcagggcacctggccttcagctggcctcaggcctgctgt |    | 230 |
| Ca303  | gtgaaaccaggggcccccaaggcagggcacctggccttcagctggcctcaggcctgctgt |    | 230 |
| Mt114  | gtgagccaggggcccccaaggcagggcacctggccttcagccctgacctgacctgctgt  |    | 231 |
| Mf     | gtgagccaggggcccccaaggcagggcacctggccttcagccctgacctgacctgctgt  |    | 231 |
| Mm1    | gtgagccaggggcccccaaggcagggcacctggccttcagccctgacctgacctgctgt  |    | 231 |
| Mm2    | gtgagccaggggcccccaaggcagggcacctggccttcagccctgacctgacctgctgt  |    | 231 |
| Ms     | gtgagccaggggcccccaaggcagggcacctggccttcagccctgacctgacctgctgt  |    | 231 |
| Ph100  | gtgagccaggggcccccaaggcagggcacctggccttcagccctgacctgacctgctgt  |    | 231 |
| Msp119 | gtgagccaggggcccccaaggcagggcacctggccttcagccctgacctgacctgctgt  |    | 231 |
| Msp102 | gtgagccaggggcccccaaggcagggcacctggccttcagccctgacctgacctgctgt  |    | 231 |
| Cang   | gtgagccaggggcccccaaggcagggcacctggccttcagccctgacctgacctgctgt  |    | 231 |
| Ac1af  | gtgagccaggggcccccaaggcagggcacctggccttcagccctgacctgacctgctgt  |    | 231 |
| Se117  | gtgagccaggggcccccaaggcagggcacctggccttcagccctgacctgacctgctgt  |    | 204 |
| Se2    | gtgagccaggggcccccaaggcagggcacctggccttcagccctgacctgacctgctgt  |    | 204 |
| Pn     | gtgagccaggggcccccaaggcagggcacctggccttcagccctgacctgacctgctgt  |    | 204 |
| To     | gtgagccaggggcccccaaggcagggcacctggccttcagccctgacctgacctgctgt  |    | 204 |
| Ta     | gtgagccaggggcccccaaggcagggcacctggccttcagccctgacctgacctgctgt  |    | 204 |
| Sv     | gtgagccaggggcccccaaggcagggcacctggccttcagccctgacctgacctgctgt  |    | 204 |
| Pm     | gtgagccaggggcccccaaggcagggcacctggccttcagccctgacctgacctgctgt  |    | 204 |
| N1     | gtgagccaggggcccccaaggcagggcacctggccttcagccctgacctgacctgctgt  |    | 204 |
| Cj     | gtgagccaggggcccccaaggcagggcacctggccttcagccctgacctgacctgctgt  |    | 204 |
| So1    | gtgagccaggggcccccaaggcagggcacctggccttcagccctgacctgacctgctgt  |    | 228 |
| Smid92 | gtgagccaggggcccccaaggcagggcacctggccttcagccctgacctgacctgctgt  |    | 228 |
| Sf115  | gtgagccaggggcccccaaggcagggcacctggccttcagccctgacctgacctgctgt  |    | 228 |
| Calgo6 | gtgagccaggggcccccaaggcagggcacctggccttcagccctgacctgacctgctgt  |    | 225 |
| Aab203 | gtgagccaggggcccccaaggcagggcacctggccttcagccctgacctgacctgctgt  |    | 221 |
| At     | gtgagccaggggcccccaaggcagggcacctg-ccttcagc-ggctcagcc-tgctgt   |    | 216 |
| Mur    | gagcaagcgggggtccccgggcagggcgccccccac--gctggcctcagccctgacct   |    | 203 |

|        |                                |     |
|--------|--------------------------------|-----|
| Hs     | cwccagATCACTGTYCTT---CTGCCATG  | 246 |
| Pt1    | ctcccagATCACTGTCCTT---CTGCCATG | 242 |
| Pt2    | ctcccagATCACTGTCCTT---CTGCCATG | 241 |
| Gg     | ctcccagATCACTGTCCTT---CTGCCATG | 258 |
| Pp1    | ctcccagATCACTGTCCTT---CTGCCATG | 258 |
| Pp2    | ctcccagATCACTGTCCTT---CTGCCATG | 258 |
| Hg1    | ctcccagATCACTGTCCTT---CCGCCATG | 258 |
| Hg2    | ctcccagATCACTGTCCTT---CCGCCATG | 258 |
| Eryp   | ctcccagATCACTGTCCTT---CCGCCATG | 258 |
| Cae    | ctctcagATCACTGTCCTT---CCGCCATG | 249 |
| Ce116  | ctcccagATCACTGTCCTT---CCGCCATG | 257 |
| Cd2A   | ctcccagATCACTGTCCTT---CCGCCATG | 257 |
| Ca303  | ctcccagATCACTGTCCTT---CCGCCATG | 257 |
| Mt114  | ctcccagATCACTGTCCTT---CCGCCATG | 258 |
| Mf     | ctcccagATCACTGTCCTT---CCGCCATG | 258 |
| Mm1    | ctcccagATCACTGTCCTT---CCGCCATG | 258 |
| Mm2    | ctcccagATCACTGTC-TT---CCGCCATG | 257 |
| Ms     | ctcccagATCACTGTCCTT---CTGCCATG | 258 |
| Ph100  | ctcccagATCACTGTCC-----TGCCATG  | 255 |
| Msp119 | ctcccagATCACTGTCCTT---CCGCCATG | 258 |
| Msp102 | ctcccagATCACTGTCCTT---CCGCCATG | 258 |
| Cang   | ctcccagATCACTGTCCTT---CCGCCATG | 258 |
| Ac1af  | ctcccagATCACTGTCCTT---CCGCCATG | 258 |
| Se117  | ctcccagATCACTGTCCTT---CCGCCATG | 231 |
| Se2    | ctcccagATCACTGTCCTT---CCGCCATG | 231 |
| Pn     | ctcccagATCACTGTCCTT---CCGCCATG | 231 |
| To     | ctcccagATCACTGTCCTT---CCGCCATG | 231 |
| Ta     | ctcccagATCACTGTCCTT---CTGCCATG | 231 |
| Sv     | ctcccagATCACTGTCCTT---CCGCCATG | 231 |
| Pm     | ctcccagATCACTGTCCTT---CTGCCATG | 231 |
| N1     | ctcccagATCACTGTCCTT---CCGCCATG | 231 |
| Cj     | ctcccagGCGCGTGTGCTT---CCACCATG | 255 |
| So1    | ctcccagGTCGCTGTGCTT---CCACCATG | 255 |
| Smid92 | ctcccagGTCGCTGTGCTT---CCACCATG | 255 |
| Sf115  | ctcccagGTCGCTGTGCTT---CCACCATG | 255 |
| Calgo6 | ctcccagGTCGCTGTGCTT---CCACCATG | 252 |
| Aab203 | ctcccagGTCGCTGTGCTT---CCACCATG | 248 |
| At     | ctcccagGTCCTGTGCTT---CCACCATG  | 243 |
| Mur    | ctcccagGTCCTTGGCCCCGCCGCCATG   | 233 |

### SUPPLEMENTAL FIGURE 5 Ancestral deletions of *INS* intron 1 in primates and their effect on splicing

**Legend:** (A) A colobine-specific, 27-nucleotide deletion in *INS* intron 1. The deleted sequence is shown at the top. (B) Splicing pattern of human reporter constructs with two large deletions that took place during primate evolution. 293T cells were transfected with pCR3.1 containing *INS* segments defined by primers D and C, as shown in Figure 1A. Deletions are at the top and RNA products to the right; M, 100-nt size marker. Total RNA was isolated 48 hours post-transfection, reverse transcribed using oligo-d(T)<sub>15</sub> and complementary DNA products were visualized using PCR with vector-specific primers PL3 and PL4 and/or PL3 and E (Kralovicova et al. 2004) (Figure 1A). (C) Relative expression of *INS* isoforms in the wild-type reporter and plasmids containing *Hominini*- and *Colobinae*-specific deletions and their combination. The alignment of intron 1 sequences in primates is shown in Supplemental Figure 4. The 16-nt deletion (ctg ccc cac ttg ggg g) took place after the *Homininae* split ~6-9 million years ago.

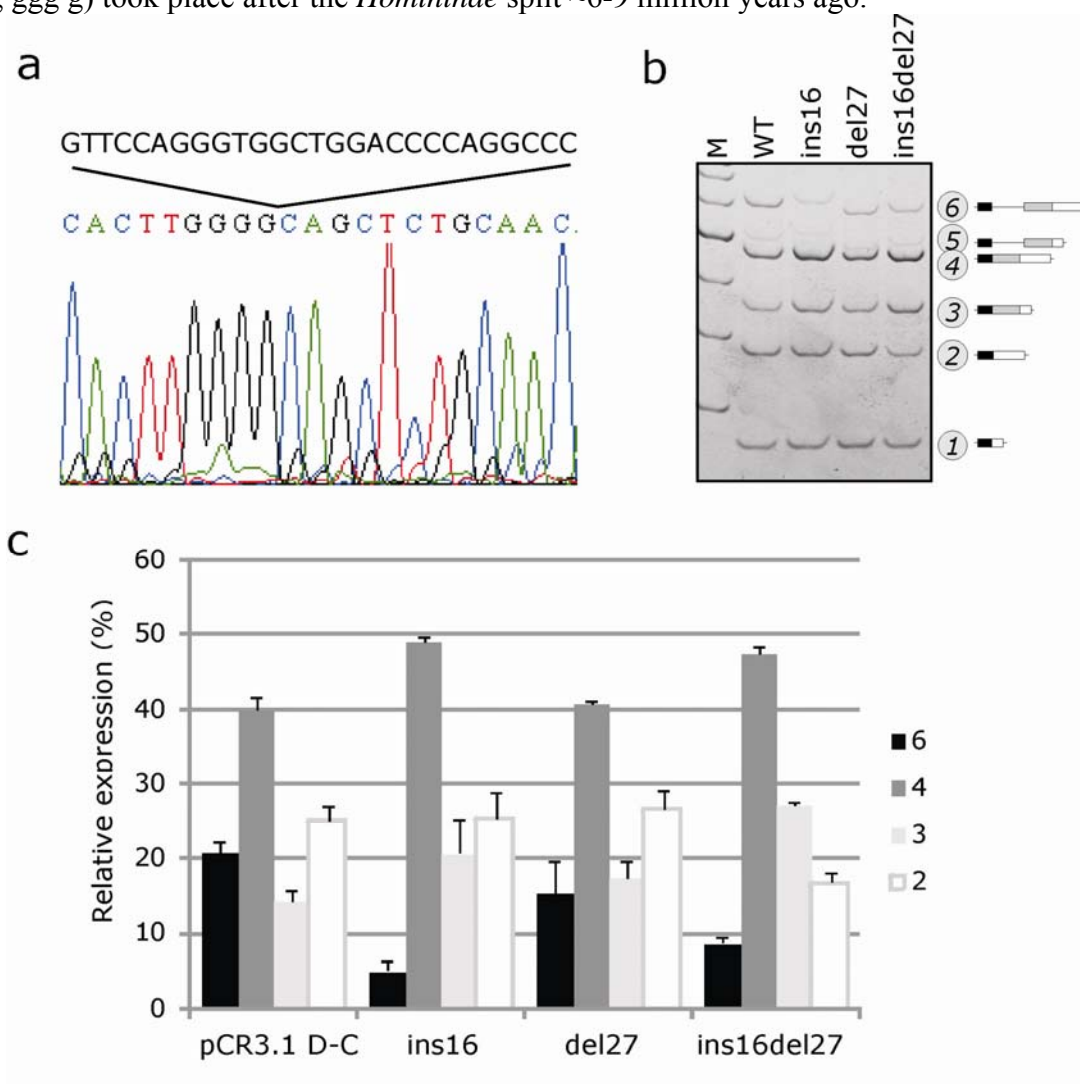

## SUPPLEMENTAL FIGURE 6 Predicted branch point sequence and polypyrimidine tract in *INS* intron 1 in primates

**Legend:** Pp, orangutan; Hs, human. Predicted branch point sequence (orange) and polypyrimidine tracts (green) were determined using an algorithm derived from a comparative analysis of these signals that were conserved between human and mouse (Kol et al. 2005). Predicted branch point sequences in the remaining primates (Supplemental Figure 4) were identical to the human sequence.

Pp

**Branch Site Sequence:**AGCCGAC **Branch site Score:**3.3

GTGAGCCAGGGGCCCCAGGGCAGGGCACCTGGCCTTCAGCCGACCTCAGCTCTGCCTGTCTCCCAG  
| ..... | ..... | ..... | ..... | ..... | ..... | ..... |  
1 ..... 10 ..... 20 ..... 30 ..... 40 ..... 50 ..... 60 ..... 67

Hs

**Branch Site Sequence:**GCCTCAG **Branch site Score:**3.2

GTGAGCCAGGGGCCCCAAGGCAGGGCACCTGGCCTTCAGCCTGCCTCAGCCCTGCCTGTCTCCCAG  
| ..... | ..... | ..... | ..... | ..... | ..... | ..... |  
1 ..... 10 ..... 20 ..... 30 ..... 40 ..... 50 ..... 60 ..... 67



**SUPPLEMENTAL FIGURE 7 Coupled translation and splicing regulation of *INS* expression by upstream open reading frames**

**Legend:** *Upper panel*, the splicing pattern of wild-type (WT; E2+1A) and mutated (E2+1G) reporter constructs 48 hours post-transfection into 293T cells. RNA products are schematically shown to the right; *middle panel*, quantification of mRNA isoforms. *Lower panel*, proinsulin concentration in cultures. Mutations introduced in two upstream open reading frames are shown at the bottom and their location and natural variability in primates is shown in Figure 3. E2+1A (WT) is specific for Great Apes, whereas E2+1G was found in all lower primates.

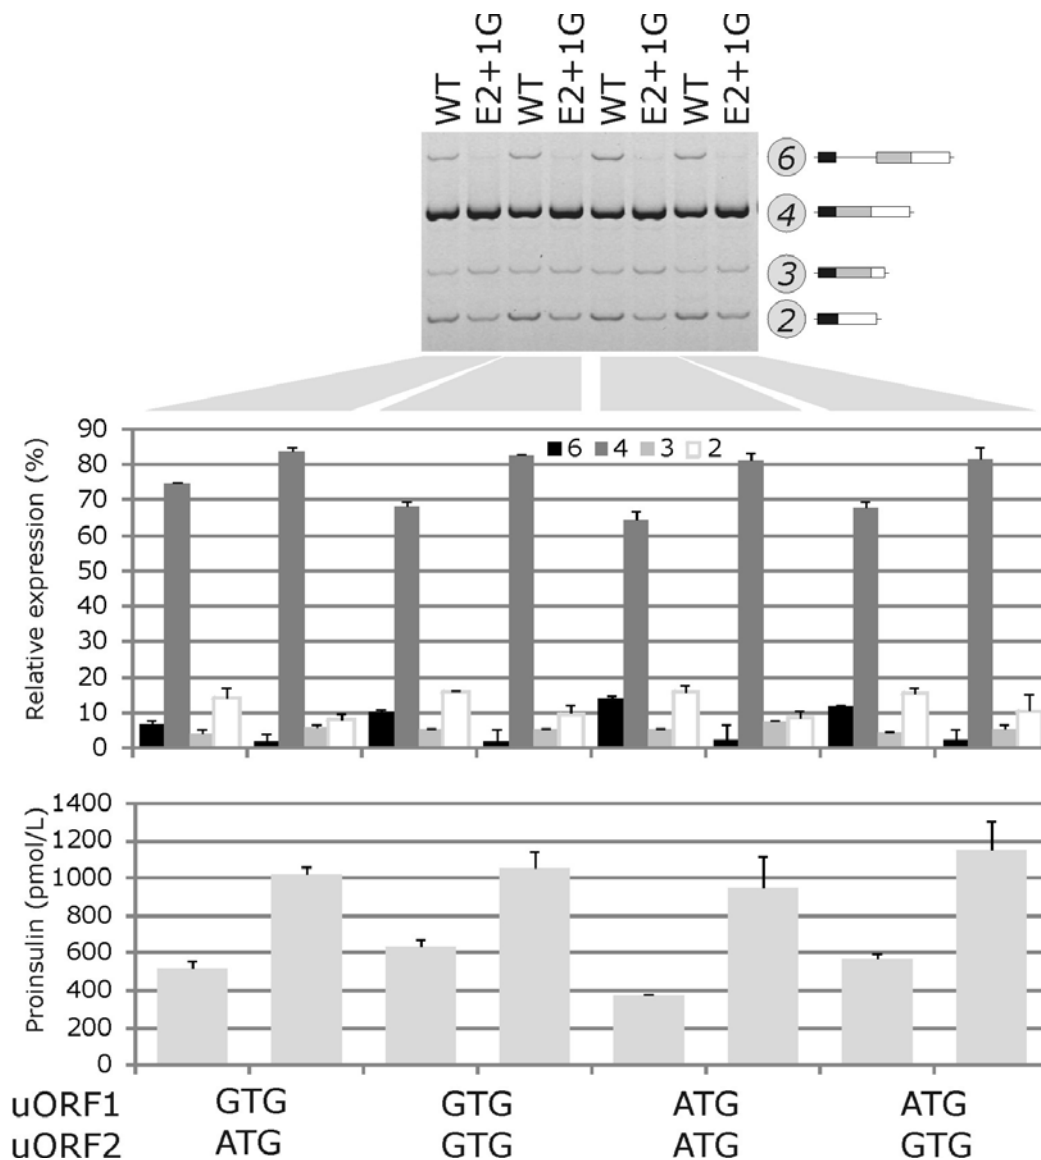

### SUPPLEMENTAL FIGURE 8 Extending translational pathophysiology: gain and loss of upstream open reading frames (uORFs) in disease predisposition

**Legend:** Splicing mutations in the gene for thrombopoetin (*TPO*) induce exon skipping and a loss of the seventh uORF, leading to derepression of translation, excess of *TPO* and thrombocytosis (Wiestner et al. 1998) (*upper panel*). In contrast, variants that influence splicing of *INS* intron 1 result in a gain of uORF that curtails translation of intron 1-containing transcripts (*lower panel*). These transcripts are exported from the nucleus to the cytoplasm (Kralovicova et al. 2006a; Wang et al. 1997). Exons are denoted by numbered boxes, introns as lines, uORFs by black rectangles, disease-causing or -predisposing mutations by stars, and the increase (*upper panel*) or decrease (*lower panel*) of translated products by arrows. The degree of translation efficiency corresponds to the vertical size of the indicated arrows.

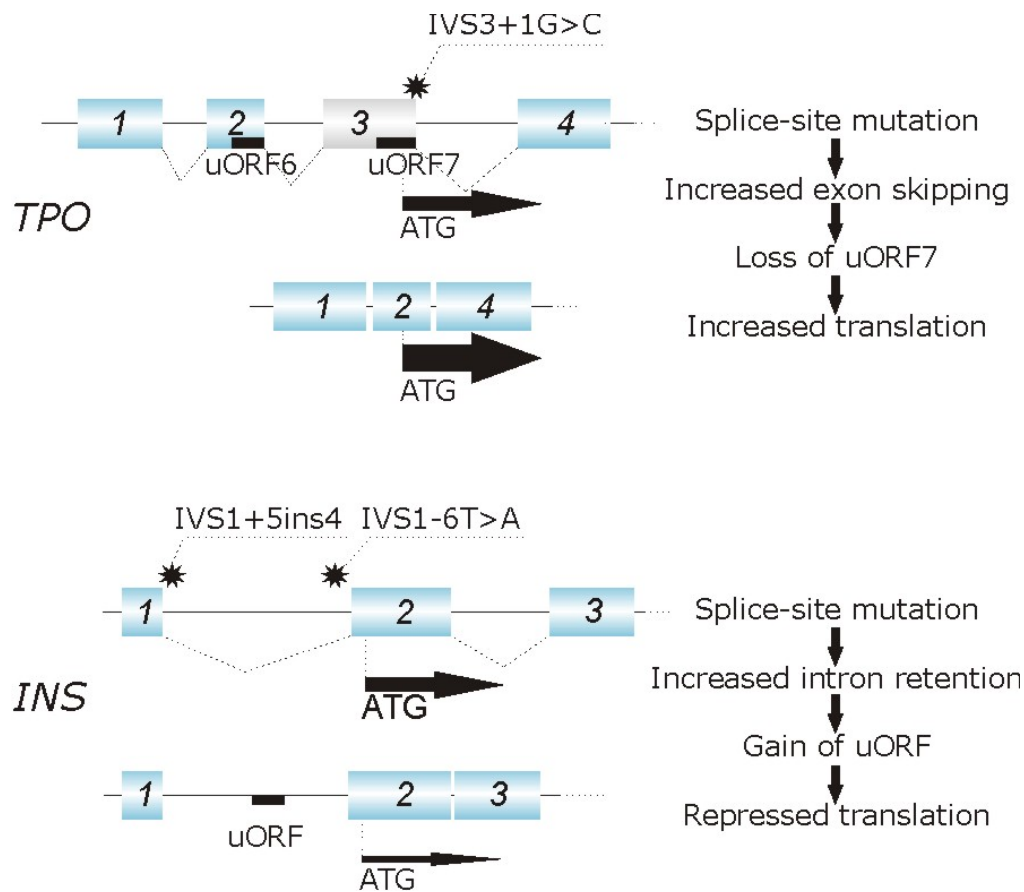

### SUPPLEMENTAL FIGURE 9 RNAi-mediated depletion of U2AF subunits

**Legend:** Western blot analysis of HeLa cells transfected with siRNAs individually targeting U2AF subunits and their isoforms. Final concentrations of each siRNA in culture media were 10, 33 and 100 nM; a scrambled control (GC content 68%) was added at a final concentration of 48 nM. Antibodies are shown to the right. Lanes 2-4 contain two-, four- and eight-fold dilutions, respectively, of the total cell lysate shown in lane 1.

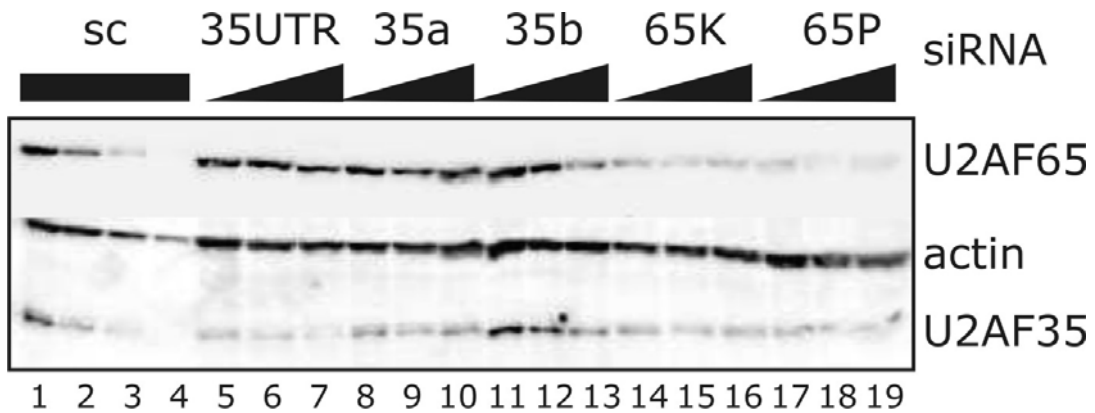

**SUPPLEMENTAL FIGURE 10 U2AF35 is effectively downregulated at low concentrations of the U2AF35ab duplex**

**Legend:** Western blot analysis was performed with antibodies shown to the right. Final concentration of the U2AF35ab siRNA in HeLa cell cultures was 0.1, 0.33, 1.0, 3.3 and 10 nM. sc, scrambled siRNA control (47% GC).

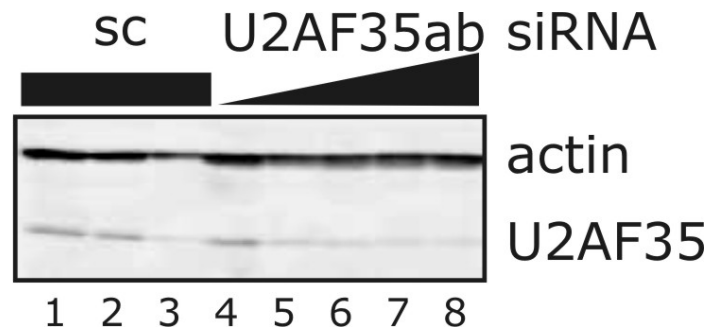

### SUPPLEMENTAL FIGURE 11 Selection of dual-specificity splice sites by U2AF35

**Legend:** (A) Schematics of the splicing pattern and location of primers (arrows) used to detect isoforms that result from the use of the 5' ss or 3' ss in *UBE2C/DIABLO* transcripts. ES, exon skipping. (B) RT-PCR analysis of total RNA extracted from HeLa cells transfected with U2AF35ab siRNA and a scrambled control (sc). Final concentrations of siRNAs are shown at the bottom. M, 100-nt size marker.

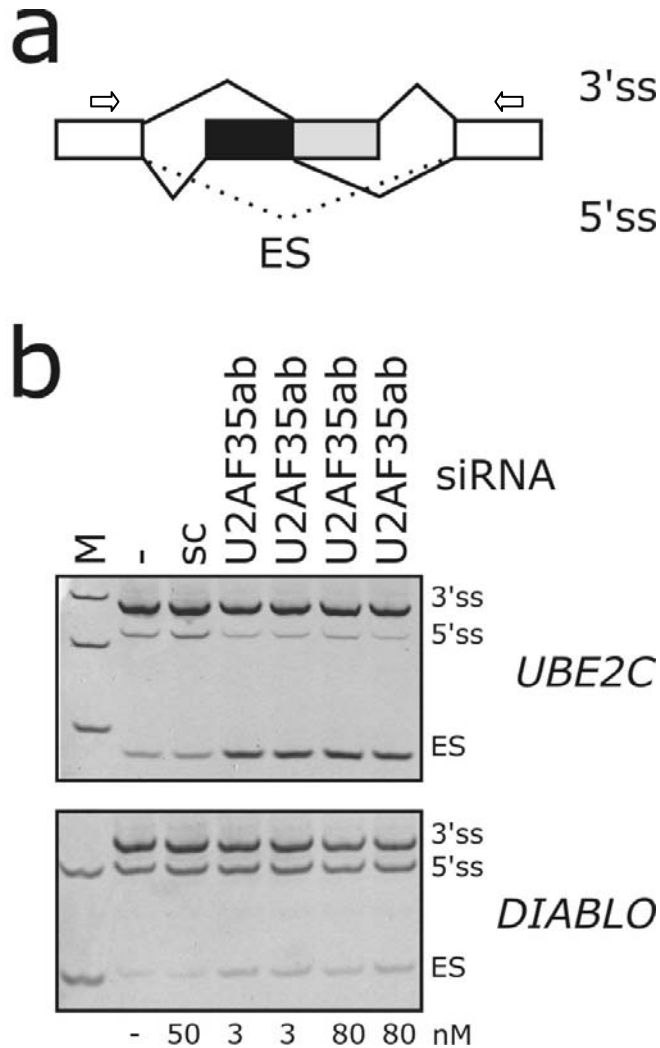

### SUPPLEMENTAL FIGURE 12 Skipping of short exons in U2AF-depleted cells

**Legend:** An example of a reporter construct with a short central exon (96 nt). The reporter construct was described previously (Kralovicova et al. 2006b). siRNAs are shown at the top, RNA products to the right, the name of the reporter to the left and utilization of the intron-proximal 3'ss at the bottom.

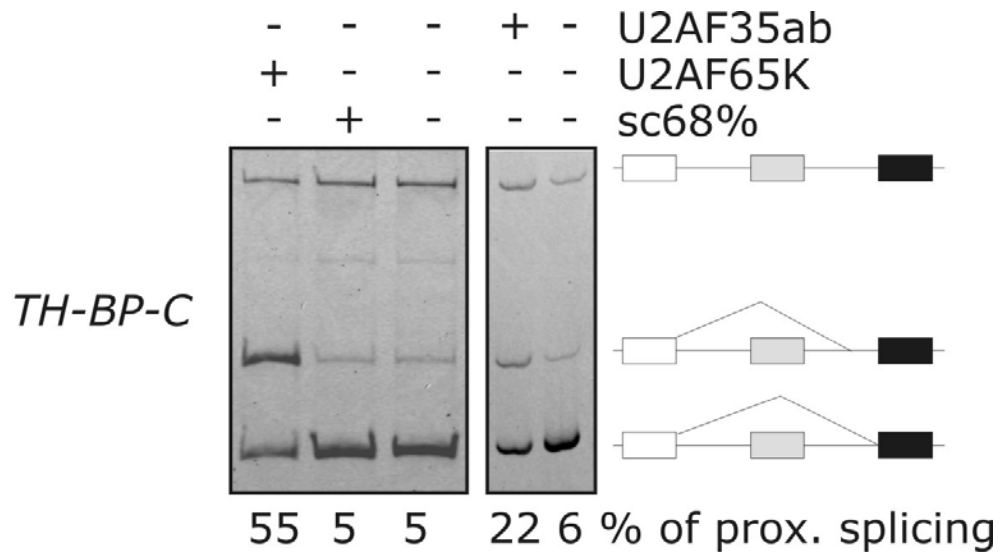

**SUPPLEMENTAL FIGURE 13 Identification of auxiliary splicing sequences in exon 2**

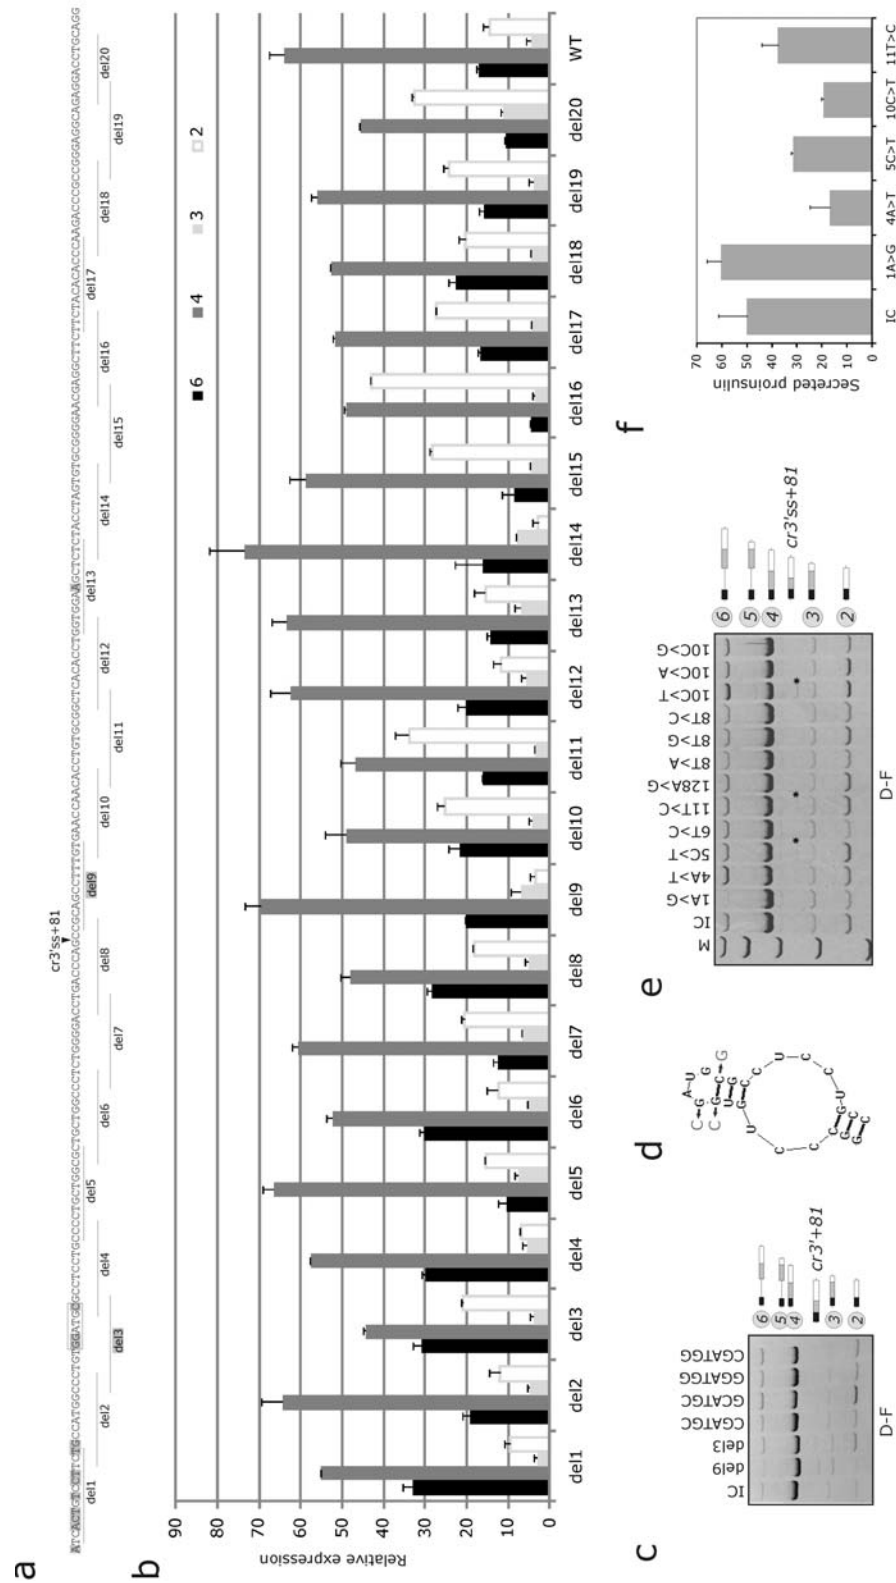

**Legend:** (A) *INS* exon 2 deletion constructs (D-F) on the class IC haplotype background. Deletions are shown as horizontal lines (denoted del1-del20). Mutated residues and two deletions that activated cr3'ss+81 are highlighted in gray. (B) Relative expression (%) of four *INS* mRNA isoforms in each deletion reporter. Error bars indicate s.d. determined from duplicate wells. The utilization of the remaining isoforms was negligible, except for activation of cr3'ss+81 in del3 and del9. (C) Identification of a splicing enhancer in exon 2. Mutations in a putative RESCUE-ESE (Fairbrother et al. 2004) (boxed in panel (A)) are shown at the top. RNA products are shown to the right and the *INS* reporter at the bottom. (D) A putative structure of the newly identified splicing enhancer in exon 2. Mutations are shown by arrows. (E) Activation of cr3'ss+81 by point mutations at exon positions 5, 10 and 11. Mutated positions are highlighted in gray in panel (A). M, 100-nt size marker. (F) Secreted proinsulin is shown on the pmol/L scale. Error bars denote standard deviations of a single transfection experiment in duplicate.

### SUPPLEMENTAL FIGURE 14 Coexpression of SR proteins/hnRNPs and *INS* in 293T cells

**Legend:** Individual SR proteins/hnRNPs are shown at the top, RNA products to the right. Reduction of exon skipping upon individual overexpression of SR proteins is highlighted. An increase of cr3'ss+126 utilization observed for a subset of hnRNPs is also boxed.

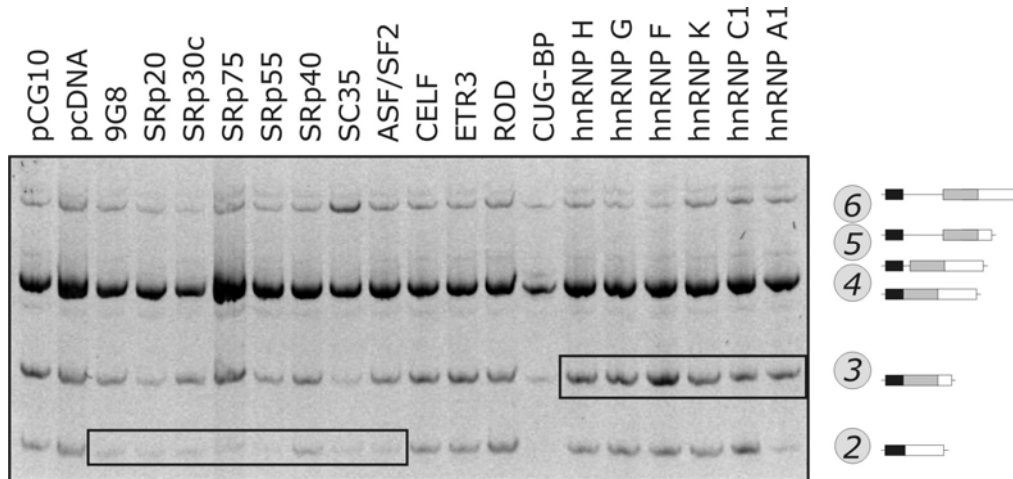



## SUPPLEMENTAL TABLES

**SUPPLEMENTAL TABLE 1 Phylogeny of G runs in *INS* intron 1 in primates**

| <b>G run</b> | <b>Great Apes</b> | <b>Old World Monkeys</b> | <b>New World Monkeys</b> | <b><i>Strepsirrhini</i></b> |
|--------------|-------------------|--------------------------|--------------------------|-----------------------------|
| G0           | x                 | x                        | x                        | x                           |
| G1           | x                 | x                        | x <sup>1</sup>           |                             |
| G2           | x                 | x <sup>2</sup>           |                          |                             |
| G3           | x                 | x                        | x <sup>1,3</sup>         | x                           |
| G4           | x                 | x                        | x                        |                             |
| G5           | x <sup>4</sup>    | x <sup>5</sup>           | x <sup>6</sup>           | x <sup>4</sup>              |
| G6           | x <sup>7</sup>    | x <sup>8</sup>           | x <sup>7</sup>           | x <sup>7</sup>              |
| G7           | x                 | x                        | x                        | x                           |

**Legend:** G runs are numbered as in Supplemental Figure 4. ‘x’ denotes a conserved G run. <sup>1</sup>, G run was shifted by 1 nucleotide in a subset of New World Monkeys; <sup>2</sup>, G run was deleted in all examined genera of Asian colobines; <sup>3</sup>, extra G<sub>3</sub> in the vicinity; <sup>4</sup>, G<sub>5</sub>; <sup>5</sup>, G<sub>5</sub>, except for *Cercopithecini*; <sup>6</sup> G<sub>4</sub>; <sup>7</sup>, G<sub>4</sub>; <sup>8</sup> G<sub>4</sub>, except for *Colobinae*.

**SUPPLEMENTAL TABLE 2 Predicted strength of *INS* splice sites**

| Intron | Splice site <sup>1</sup> | Consensus sequence <sup>2</sup>   | Maximum entropy score (allele) <sup>3</sup>          |
|--------|--------------------------|-----------------------------------|------------------------------------------------------|
| 1      | 5'ss                     | CAG/ <u>GT</u> CTKT               | 6.84 ( <i>INS</i> -69del), 2.36 ( <i>INS</i> -69ins) |
| 1      | Cr5'ss+30                | CAG/ <u>GT</u> GGRC               | 8.07 ( <i>INS</i> -26G), 3.09 ( <i>INS</i> -26A)     |
| 1      | 3'ss                     | CAGCCCTGCCTGTCWCCC <u>AG</u> /ATC | 7.57 ( <i>INS</i> -27T), 4.75 ( <i>INS</i> -27A)     |
| 1      | Cr3'ss+81                | CCTCTGGGGACCTGACCC <u>AG</u> /CCG | -1.12                                                |
| 2      | 5'ss                     | AGG/ <u>GT</u> GAGC               | 7.75                                                 |
| 2      | 3'ss                     | TGCGCGGCACGTCCTGGC <u>AG</u> /TGG | 4.36                                                 |
| 2      | Cr3'ss+35                | GGGCGGGGGCCCTGGTGC <u>AG</u> /GCA | 1.54                                                 |
| 2      | Cr3'ss+126               | GCATCTGCTCCCTCTACC <u>AG</u> /CTG | 8.24                                                 |

**Legend:** <sup>1</sup>Cryptic (Cr) splice sites are denoted by their exon/intron position (in nucleotides) relative to their authentic counterparts; <sup>2</sup>, IUB codes: K is G or T, R is A or G, W is A or T. GT and AG dinucleotides are underlined. Exon/intron boundaries are denoted by a slash. <sup>3</sup>, Maximum entropy scores were computed as described (Buratti et al. 2007; Vorechovsky 2006; Yeo and Burge 2004). Location of the three variants is shown in Figure 1A. Their designation is according to the previously published nomenclature (Stead et al. 2003); del/ins, 4-nucleotide deletion/insertion allele at *INS*-69. The composite score of intron 1 splice sites is 11.59/14.41 (haplotype I/III, respectively), which is comparable to the composite score of intron 2 splice sites (12.01).

**SUPPLEMENTAL TABLE 3 Oligonucleotide primers amplifying competing 3'ss in endogenous transcripts**

| Gene                      | Exon | ID# <sup>1</sup> | Primers (5'-3')                               | Size of PCR products | Distance between competing 3'ss |
|---------------------------|------|------------------|-----------------------------------------------|----------------------|---------------------------------|
| <i>SERBP1</i>             | 5    | Far2             | CTCACAACTGGGGAAGTGTGTC<br>TGCTGCCACTGGATGATGT | 102/147              | 45                              |
| <i>SRRM1</i>              | 6    | Far3             | AAAAAAGGGAGCGGTCTCGTA<br>AAGTAGCCTCTTGTACTGAA | 138/228              | 90                              |
| <i>SLC15A4</i>            | 3    | Far12            | CTGTTCCCAGAAGCGAAGTG<br>GAAAACAGGGACAATCTTGA  | 114/172              | 58                              |
| <i>CIT</i>                | 30   | Far13            | TGAAAATGGAAGGCACTATT<br>GAAGGGCTTCCTCTAGCTCT  | 165/210              | 45                              |
| <i>LRRC28</i>             | 6    | Far15            | GGATCTTAGTGACAATGCCT<br>AAGTGGCAAAAATGCAAGAC  | 226/321              | 95                              |
| <i>SEPT4</i>              | 11   | Far19            | GGACCTGAAGGATGTGACAC<br>CCTCATCTTTCTCTCGGATA  | 144/197              | 53                              |
| <i>STAT3</i>              | 23   | Far20            | CGCTGCCCCATACCTGAAGA<br>TGAGGGTTCAGCACCTTCAC  | 89/139               | 50                              |
| <i>ATP13A1</i>            | 14   | Far24            | GGAGGTGACCCAGTGTCCA<br>TACGAGGCAAGCACGGACAT   | 182/252              | 70                              |
| <i>FAM134A</i>            | 4    | Far25            | CCTTCTTCTACTCAGCGTC<br>GCTGGATTCTGCCTCTTGTA   | 156/244              | 88                              |
| <i>MAP4K4</i>             | 11   | Far27            | GAAGAGGAGCAGCGCACTT<br>CTCGGTCAGCAGGCTCGTAG   | 187/280              | 93                              |
| <i>C20orf30</i>           | 3    | Far28            | TTATGATGCCGTCCCGTACC<br>CCTTGCTGATGTAGCCTGA   | 135/223              | 88                              |
| <i>SLC35C2</i>            | 3    | Far29            | TTTGTGGAAGGCGGTGTTGA<br>CCCAGCTCAGCACCCACACGG | 141/212              | 71                              |
| <i>SFRS15</i>             | 19   | Far30            | CCTCACACTCCACCAATAAG<br>GTGAAAACAGGCTGGGTTACA | 151/217              | 66                              |
| <i>FMR1-201</i>           | 15   | E15              | GACGCGGTCTGGATATACTT<br>CCTCCACGCCCGCTCCGT    | 85/124/160           | 39/36                           |
| <i>FMR1-201</i>           | 16   | E16              | GTAATCCAAGAGAGCTAAAG<br>TTGCTGACCATCCACGCTGTC | 134/185              | 51                              |
| <i>ECM1<sup>2</sup></i>   | 4    | Far1             | CCCCCCCCTATCCGAAGC<br>GGGAGTTGGCAGGTAGCAG     | 148/235              | 87                              |
| <i>SPOPL<sup>2</sup></i>  | 4    | Far26            | AGGAAATGGGTGAAGTGTTA<br>TTGTTTCTTCCCTTTTAGCA  | 136/207              | 71                              |
| <i>PRP3<sup>2</sup></i>   | 12   | Far4             | TTTGATGCGAGTATTAGGAA<br>TTTAAATTTTCTTGACCTTT  | 155/213              | 58                              |
| <i>EIF3S7<sup>2</sup></i> | 15   | -                | CTGATGGCACCTTCAGCTCT<br>CCTCGTAGTCTCGGTGGAAG  | 127/295              | 168                             |
| <i>PTK9<sup>2</sup></i>   | 12   | -                | GAGGAGCAGCCACTTCCTG<br>CTCCACTGTCCCAGCTCTTC   | 128/247              | 119                             |
| <i>CUEDC1</i>             | 17   | -                | GCCTGCGAGAAGGACAGTAA<br>TCGGTTCTCAAGCACCATCT  | 141/213              | 72                              |

**Legend:** <sup>1</sup>, Identity number corresponding to a previously described set of tandem 3'ss separated by >39 nt (Akerman and Mandel-Gutfreund 2007). <sup>2</sup>, PCR products did not show the predicted size or failed to amplify.

**SUPPLEMENTAL TABLE 4 Selection of competing 3'ss upon depletion of U2AF subunits**

| Gene                                         | ID 3'ss <sup>4</sup>                                 | ID 3'ss in U2AF35(-) <sup>5</sup>                  | 3'ss promoted in U2AF35(-) cells | ID 3'ss in U2AF65(-)                               | 3'ss promoted in U2AF65(-) cells | Intron-proximal 3'ss (ME score) | Intron-distal 3'ss (ME score) | Splice site more dependent on U2AF |
|----------------------------------------------|------------------------------------------------------|----------------------------------------------------|----------------------------------|----------------------------------------------------|----------------------------------|---------------------------------|-------------------------------|------------------------------------|
| <i>MAP4K4</i> <sup>1</sup>                   | 50                                                   | 39                                                 | Intron-proximal                  | 38                                                 | Intron-proximal                  | AAG/G (7.8)                     | CAG/C (9.6)                   | Intron-distal (stronger)           |
| <i>SLC35C2</i> <sup>1</sup>                  | 12                                                   | 51                                                 | Intron-distal                    | 63                                                 | Intron-distal                    | CAG/A (5.7)                     | CAG/G (8.9)                   | Intron-proximal (weaker)           |
| <i>SRRM1</i> <sup>1</sup>                    | 10                                                   | 1                                                  | Intron-proximal                  | 1                                                  | Intron-proximal                  | TAG/A (4.5)                     | CAG/A (7.4)                   | Intron-distal (stronger)           |
| <i>EMR1-201</i> <sup>1</sup>                 | 17                                                   | 8                                                  | Intron-proximal                  | 9                                                  | Intron-proximal                  | TAG/G (7.4)<br>CAG/A (4.0)      | TAG/C (-0.7)                  | Intron-distal (weaker)             |
| <i>CUEDC1</i> <sup>1</sup>                   | 82                                                   | 90                                                 | Intron-distal                    | 88                                                 | Intron-distal                    | CAG/G (8.3)                     | CAG/A (0.8)                   | Intron-proximal (weaker)           |
| <i>UBE2C</i> <sup>1,2</sup>                  | 78                                                   | 90                                                 | Intron-distal                    | N.D.                                               | N.D.                             | AAG/G (3.0)                     | CAG/G (6.7)                   | Intron-proximal (weaker)           |
| <i>DIABLO</i> <sup>1,2</sup>                 | 65                                                   | 60                                                 | Intron-proximal                  | N.D.                                               | N.D.                             | TAG/G (10.4)                    | CAG/G (8.8)                   | Intron-distal (weaker)             |
| <i>INS intron 1(cr3'ss+81)</i> <sup>1</sup>  | 0                                                    | 19                                                 | Intron-distal                    | 0                                                  | N.I.                             | CAG/A (4.8)                     | CAG/C (-1.1)                  | Intron-proximal (stronger)         |
| <i>INS intron 2(cr3'ss+126)</i> <sup>1</sup> | 15 (IC D-F) <sup>6</sup><br>55 (IC D-C) <sup>6</sup> | 0 (IC D-F) <sup>6</sup><br>3 (IC D-C) <sup>6</sup> | Intron-proximal                  | 2 (IC D-F) <sup>6</sup><br>9 (IC D-C) <sup>6</sup> | Intron-proximal                  | CAG/T (4.4)                     | CAG/C (8.2)                   | Intron-distal (stronger)           |
| <i>LIPC (ESS13, SS63)</i> <sup>1</sup>       | 54                                                   | 40                                                 | Intron-proximal                  | 38                                                 | Intron-proximal                  | TAG/A (6.2)                     | CAG/T (-2.3)                  | Intron-distal (weaker)             |
| <i>TH-BP-C</i> <sup>1</sup>                  | 95                                                   | 78                                                 | Intron-proximal                  | 45                                                 | Intron-proximal                  | CAG/G (5.2)                     | CAG/C (5.1)                   | Intron-distal (weaker)             |

**Legend:** <sup>1</sup>, endogenous transcripts; <sup>2</sup>, dual-specificity splice sites (Zhang et al. 2007); <sup>3</sup>, exogenous transcripts; *LIPC* and *TH* minigenes were described previously (Kralovicova et al. 2006b; Kralovicova and Vorechovsky 2007); <sup>4</sup>, % of splicing to intron-distal 3'ss in untreated cells; <sup>5</sup>, % of splicing to intron-distal 3'ss in U2AF35-deficient (-) cells; <sup>6</sup>, haplotype and primers used for minigene cloning are in parentheses. N.I., not informative; N.D., not determined; ME (maximum entropy) scores were computed as described previously (Buratti et al. 2007; Vorechovsky 2006; Yeo and Burge 2004).

**SUPPLEMENTAL TABLE 5 A list of synthetic small interfering RNAs**

| <b>Target</b>              | <b>siRNA</b>         | <b>Source</b>           |
|----------------------------|----------------------|-------------------------|
| U2AF35a                    | CCAUUGCCCUUUGAACAU   | (Pacheco et al. 2006)   |
| U2AF35b                    | CCAUCUUGAUUCAAACAUC  | (Pacheco et al. 2006)   |
| hU2AF35ab                  | GGCUGUGAUUGACUUGAAU  | (Pacheco et al. 2006)   |
| U2AF35-UTR                 | AGUGUUGUAGUUGAUUGAC  | This study              |
| U2AF26-UTR                 | AGCCCCUUCACUCUCCUG   | This study              |
| U2AF26-83                  | GGACAAGGUU AACUGCUCU | This study              |
| U2AF65K                    | GCAAGUACGGGCUUGUCA   | (Hastings et al. 2007)  |
| U2AF65P                    | GCACGGUGGACUGAUUCGU  | (Pacheco et al. 2006)   |
| PUF60                      | GCAGAUGAACUCGGUGAUG  | (Hastings et al. 2007)  |
| nPTB-N1                    | GAGAGGAUCUGACGAACUA  | (Spellman et al. 2007)  |
| nPTB-N3                    | UAAGAAACCUGGAUCCAAA  | (Spellman et al. 2007)  |
| PTB                        | CUUCCAUCAUCCAGAGAA   | (Wollerton et al. 2004) |
| 9G8-Gao                    | AGAUCAAGAUCAGGUCUA   | (Gao et al. 2007)       |
| 9G8-UTR                    | GGGAUUUGUGAUGUCUGUA  | This study              |
| 9G8-UTR2                   | GUGUAACCUAGGAAAGUA   | This study              |
| SRp75-1                    | AGACCAAGCUGAAGAGAAG  | This study              |
| SRp75-2                    | AGCAGUCAUUCUAAGAGUA  | This study              |
| SRp55-1                    | GCAGAUCUAAGGAUGAGUA  | This study              |
| SRp55-2                    | AAGAUGAGGCUCUAAGGAA  | This study              |
| SRp40-1                    | UGCUCACCUGUAAGAACA   | This study              |
| SRp40-2                    | ACGUGGUUCUUAAGUAGA   | This study              |
| SRp30c                     | AGAGGAUGCUAUUUUAUGGA | (Paradis et al. 2007)   |
| SRp30b/SC35                | AAUCCAGGUCGCGAUCGAA  | (Gabut et al. 2005),    |
| SRp30b/SC35                | CAAGCAACUGGCUAUUGAA  | This study              |
| SRp30a/ASF                 | ACGAUUGCCGCAUCUACGU  | (Karni et al. 2007)     |
| SRp20-1                    | GGAAAUAGAAGACAGUUUG  | (Bedard et al. 2007)    |
| SRp20-2                    | GGUCCCUUUCUAGAGAUAG  | (Bedard et al. 2007)    |
| RSRC1-ORF1                 | GAACGCGUAGUCGGUCUCG  | This study              |
| RSRC1-ORF2                 | UGGGCAGUCCUGUGGCCUA  | This study              |
| Scrambled control (47% CG) | AGGUAGUGUAAUCGCCUUG  | This study              |
| Scrambled control (68% CG) | UGCUCUAGGCCUCGGUUGC  | This study              |
| hnRNP H                    | UCAGAAGAUGAAGUCAAAU  | (Paul et al. 2006)      |
| hnRNP-F                    | GCGACCGAGAACGACAUUU  | (Garneau et al. 2005)   |
| Tra2 $\alpha$ -UTR         | CGGAAUGGUUGCAAUUAAG  | This study              |
| Tra2 $\beta$ -UTR          | GCAUGAAGACUUUCUGAAA  | This study              |
| ZRSR1/2                    | CAACAACUAGAAGAAGAGA  | This study              |
| ZRSR2-UTR                  | GGCUAUGAACGCAGAUGGG  | This study              |
| CAPER $\alpha$ -UTR        | GGAUCUACUGUCAUUUGUA  | This study              |
| CAPER $\beta$ -UTR         | UCAGUGGCACAGUAUACUG  | This study              |
| hSlu7-ORF                  | GUGAGUUAUGCUGGAGUA   | This study              |
| hSlu7-UTR                  | GACCAUCCAAGAUAGAUGC  | This study              |

## References to Supplemental material

- Akerman M, Mandel-Gutfreund Y (2007) Does distance matter? Variations in alternative 3' splicing regulation. *Nucleic Acids Res* 35:5487-5498
- Bedard KM, Daijogo S, Semler BL (2007) A nucleo-cytoplasmic SR protein functions in viral IRES-mediated translation initiation. *EMBO J* 26:459-467
- Buratti E, Chivers MC, Kralovicova J, Romano M, Baralle M, Krainer AR, Vorechovsky I (2007) Aberrant 5' splice sites in human disease genes: mutation pattern, nucleotide structure and comparison of computational tools that predict their utilization. *Nucleic Acids Res* 35:4250-4263
- Fairbrother WG, Yeo GW, Yeh R, Goldstein P, Mawson M, Sharp PA, Burge CB (2004) RESCUE-ESE identifies candidate exonic splicing enhancers in vertebrate exons. *Nucleic Acids Res* 32:W187-190
- Gabut M, Mine M, Marsac C, Brivet M, Tazi J, Soret J (2005) The SR protein SC35 is responsible for aberrant splicing of the E1alpha pyruvate dehydrogenase mRNA in a case of mental retardation with lactic acidosis. *Mol Cell Biol* 25:3286-3294
- Gao L, Wang J, Wang Y, Andreadis A (2007) SR protein 9G8 modulates splicing of tau exon 10 via its proximal downstream intron, a clustering region for frontotemporal dementia mutations. *Mol Cell Neurosci* 34:48-58
- Garneau D, Revil T, Fiset JF, Chabot B (2005) Heterogeneous nuclear ribonucleoprotein F/H proteins modulate the alternative splicing of the apoptotic mediator Bcl-x. *J Biol Chem* 280:22641-22650
- Hastings ML, Allemand E, Duelli DM, Myers MP, Krainer AR (2007) Control of pre-mRNA splicing by the general splicing factors PUF60 and U2AF. *PLoS ONE* 2:e538
- Karni R, de Stanchina E, Lowe SW, Sinha R, Mu D, Krainer AR (2007) The gene encoding the splicing factor SF2/ASF is a proto-oncogene. *Nat Struct Mol Biol* 14:185-193
- Kol G, Lev-Maor G, Ast G (2005) Human-mouse comparative analysis reveals that branch-site plasticity contributes to splicing regulation. *Hum Mol Genet* 14:1559-1568
- Kralovicova J, Gaunt TR, Rodriguez S, Wood PJ, Day INM, Vorechovsky I (2006a) Variants in the human insulin gene that affect pre-mRNA splicing: is -23HphI a functional single nucleotide polymorphism at *IDDM2*? *Diabetes* 55:260-264
- Kralovicova J, Haixin L, Vorechovsky I (2006b) Phenotypic consequences of branchpoint substitutions. *Hum Mutat* 27:803-813
- Kralovicova J, Houngninou-Molango S, Kramer A, Vorechovsky I (2004) Branch sites haplotypes that control alternative splicing. *Hum Mol Genet* 13:3189-3202
- Kralovicova J, Vorechovsky I (2007) Global control of aberrant splice site activation by auxiliary splicing sequences: evidence for a gradient in exon and intron definition. *Nucleic Acids Res* 35:6399-6413
- Pacheco TR, Coelho MB, Desterro JM, Mollet I, Carmo-Fonseca M (2006) In vivo requirement of the small subunit of U2AF for recognition of a weak 3' splice site. *Mol Cell Biol* 26:8183-8190
- Paradis C, Cloutier P, Shkreta L, Toutant J, Klarskov K, Chabot B (2007) hnRNP I/PTB can antagonize the splicing repressor activity of SRp30c. *RNA* 13:1287-1300
- Paul S, Dansithong W, Kim D, Rossi J, Webster NJ, Comai L, Reddy S (2006) Interaction of muscleblind, CUG-BP1 and hnRNP H proteins in DM1-associated aberrant IR splicing. *EMBO J* 25:4271-4283
- Rigo F, Martinson HG (2008) Functional coupling of last-intron splicing and 3'-end processing to transcription in vitro: the poly(A) signal couples to splicing before committing to cleavage. *Mol Cell Biol* 28:849-862
- Spellman R, Llorian M, Smith CW (2007) Crossregulation and functional redundancy between the splicing regulator PTB and its paralogs nPTB and ROD1. *Mol Cell* 27:420-434
- Stead JD, Hurler ME, Jeffreys AJ (2003) Global haplotype diversity in the human insulin gene region. *Genome Res* 13:2101-2111
- Vorechovsky I (2006) Aberrant 3' splice sites in human disease genes: mutation pattern, nucleotide structure and comparison of computational tools that predict their utilization. *Nucleic Acids Res* 34:4630-4641
- Wang J, Shen L, Najafi H, Kolberg J, Matschinsky FM, Urdea M, German M (1997) Regulation of insulin preRNA splicing by glucose. *Proc Natl Acad Sci USA* 94:4360-4365
- Wiestner A, Schlemper RJ, van der Maas AP, Skoda RC (1998) An activating splice donor mutation in the thrombopoietin gene causes hereditary thrombocythaemia. *Nat Genet* 18:49-52
- Wollerton MC, Gooding C, Wagner EJ, Garcia-Blanco MA, Smith CW (2004) Autoregulation of polypyrimidine tract binding protein by alternative splicing leading to nonsense-mediated decay. *Mol Cell* 13:91-100
- Yeo G, Burge CB (2004) Maximum entropy modeling of short sequence motifs with applications to RNA splicing signals. *J Comput Biol* 11:377-394

Kralovicova J, Vorechovsky I.  
Haplotype-dependent proinsulin expression is controlled by U2AF

Page 23 of 23

Zhang C, Hastings ML, Krainer AR, Zhang MQ (2007) Dual-specificity splice sites function alternatively as 5' and 3' splice sites. *Proc Natl Acad Sci USA* 104:15028-15033
